# Supplementary material for: Advances of isomerizing-hydrogenating properties of CoMo catalysts supported on ASA-Al2O3
Source: Research Square preprint supplement (doi:10.21203/rs.3.rs-1390781/v1), 2022-03-16
Supplement: Supplementary file 1 [file 7103808bd35e0a05359228ff.docx]

Supplementary Information

**Advances of isomerizing-hydrogenating properties of CoMo catalysts supported on ASA-Al2O3**

**E.A. Avdeenko, K.A. Nadeina*, A.E. Lushchikova, T.V. Larina, V.P. Pakharukova, E.Yu. Gerasimov, I.P. Prosvirin, A.A. Gabrienko, Yu.V. Vatutina, O.V. Klimov, A.S. Noskov**

Boreskov Institute of Catalysis SB RAS, Lavrentiev Ave. 5, Novosibirsk, Russia, 630090

*** Corresponding author.**

E-mail address: lakmallow@catalysis.ru (Nadeina K.A.)


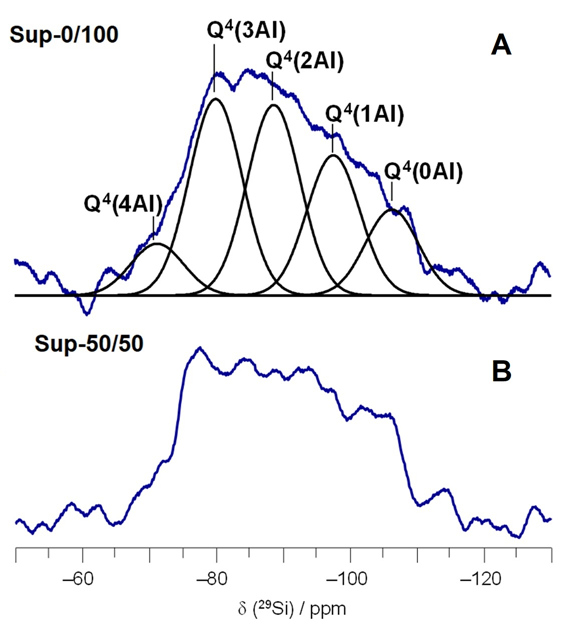


Figure SI1 – 29Si MAS NMR spectra of the samples a) Sup-0/100 and b) Sup-50/50. Black lines represent the signals from Si atoms of Q4(nAl) framework units, n = 0÷4, in the aluminosilicate structure.


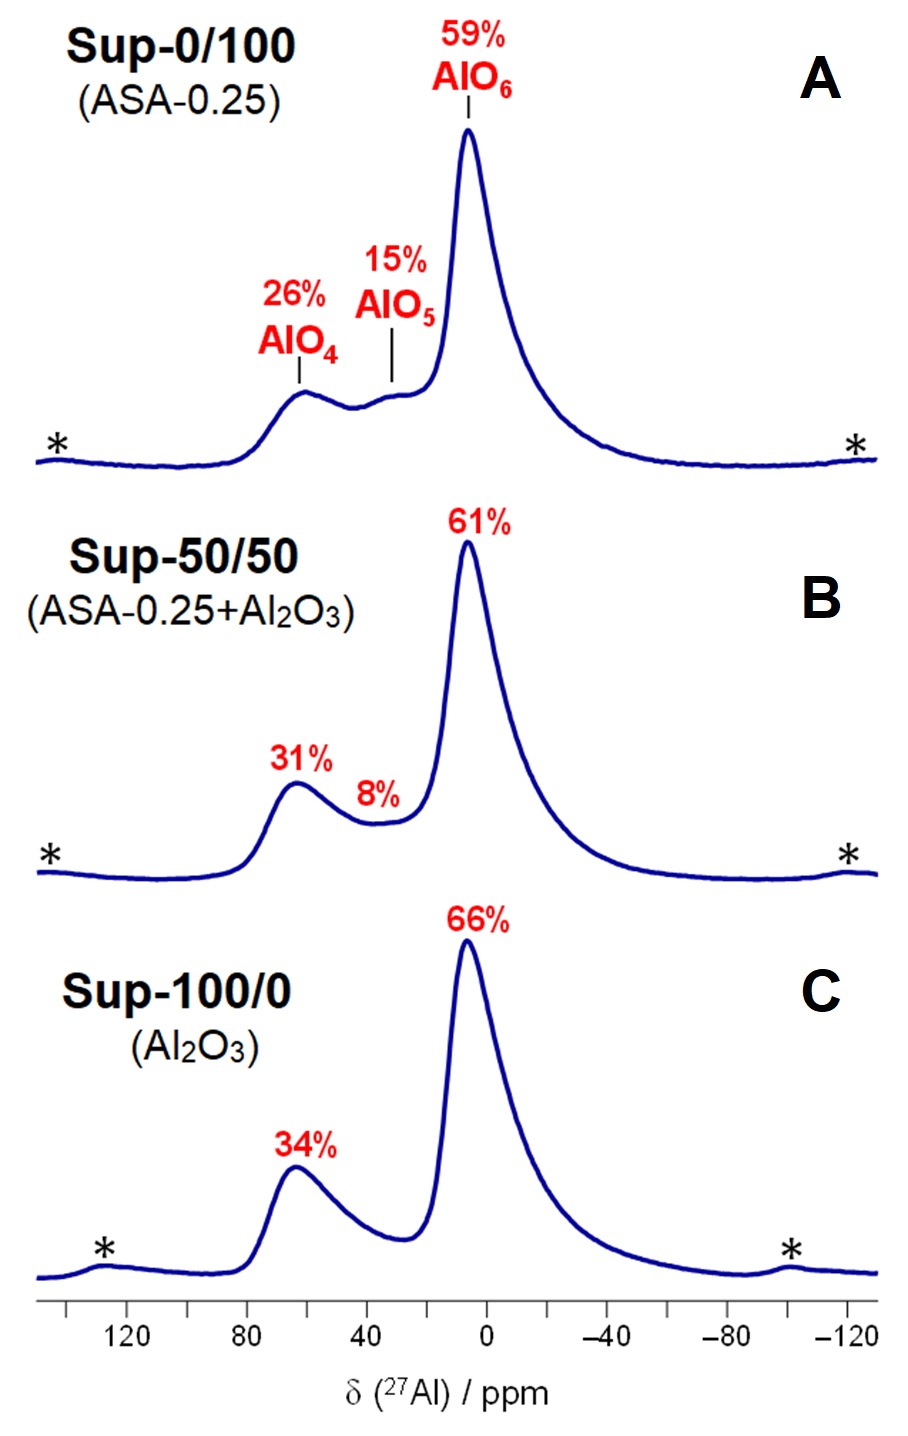


Figure SI2 – 27Al MAS NMR spectra of the samples a) Sup-0/100, b) Sup-50/50 and c) Sup-100/0. The signals at about 70, 30 and 13 ppm belong to four-, five- and sixfold coordinated aluminium atoms in AlO4, AlO5 and AlO6 units, respectively. Asterisks denote spinning sidebands.

Figure SI3 – X-ray diffraction patterns of the supports. Characteristic bands and relative intensities of the peaks of γ-Al2O3 phase are shown as black lines.

Table SI4 – Textural properties of ASA and Al2O3 powders, supports and catalysts

| **Al2O3/ASA ratio** | **Sample** | **SSA, m2/g** | **V, cm3/g** | **D, Å** | **Pore portion, %** | | | | |
| --- | --- | --- | --- | --- | --- | --- | --- | --- | --- |
| **<50 Å** | **50-100 Å** | **100-200 Å** | **>200 Å** | **70-130 Å** |
| **initial ASA** | | 479 | 1.60 | 134 | 12 | 42 | 23 | 22 | 38 |
| **initial Al2O3** | | 227 | 0.55 | 97 | 11 | 53 | 31 | 3 | 50 |
| **100/0** | **Sup** | 216 | 0.45 | 84 | 20 | 58 | 19 | 2 | 44 |
| **CoMo** | 184 | 0.42 | 73 | 21 | 56 | 19 | 2 | 43 |
| **90/10** | **Sup** | 271 | 0.55 | 81 | 18 | 50 | 25 | 5 | 40 |
| **CoMo** | 231 | 0.46 | 80 | 18 | 47 | 28 | 5 | 40 |
| **70/30** | **Sup** | 328 | 0.78 | 95 | 14 | 42 | 32 | 10 | 40 |
| **CoMo** | 271 | 0.66 | 98 | 13 | 38 | 34 | 12 | 39 |
| **50/50** | **Sup** | 397 | 1.08 | 109 | 12 | 36 | 31 | 20 | 35 |
| **CoMo** | 323 | 0.88 | 109 | 11 | 32 | 34 | 21 | 35 |
| **30/70** | **Sup** | 417 | 1.17 | 112 | 12 | 35 | 28 | 23 | 34 |
| **CoMo** | 345 | 0.96 | 116 | 10 | 34 | 32 | 22 | 36 |
| **10/90** | **Sup** | 429 | 1.26 | 121 | 11 | 34 | 26 | 28 | 32 |
| **CoMo** | 364 | 1.06 | 126 | 11 | 35 | 30 | 22 | 37 |
| **0/100** | **Sup** | 443 | 1.30 | 117 | 15 | 36 | 25 | 22 | 33 |
| **CoMo** | 381 | 0.94 | 124 | 12 | 34 | 28 | 23 | 35 |


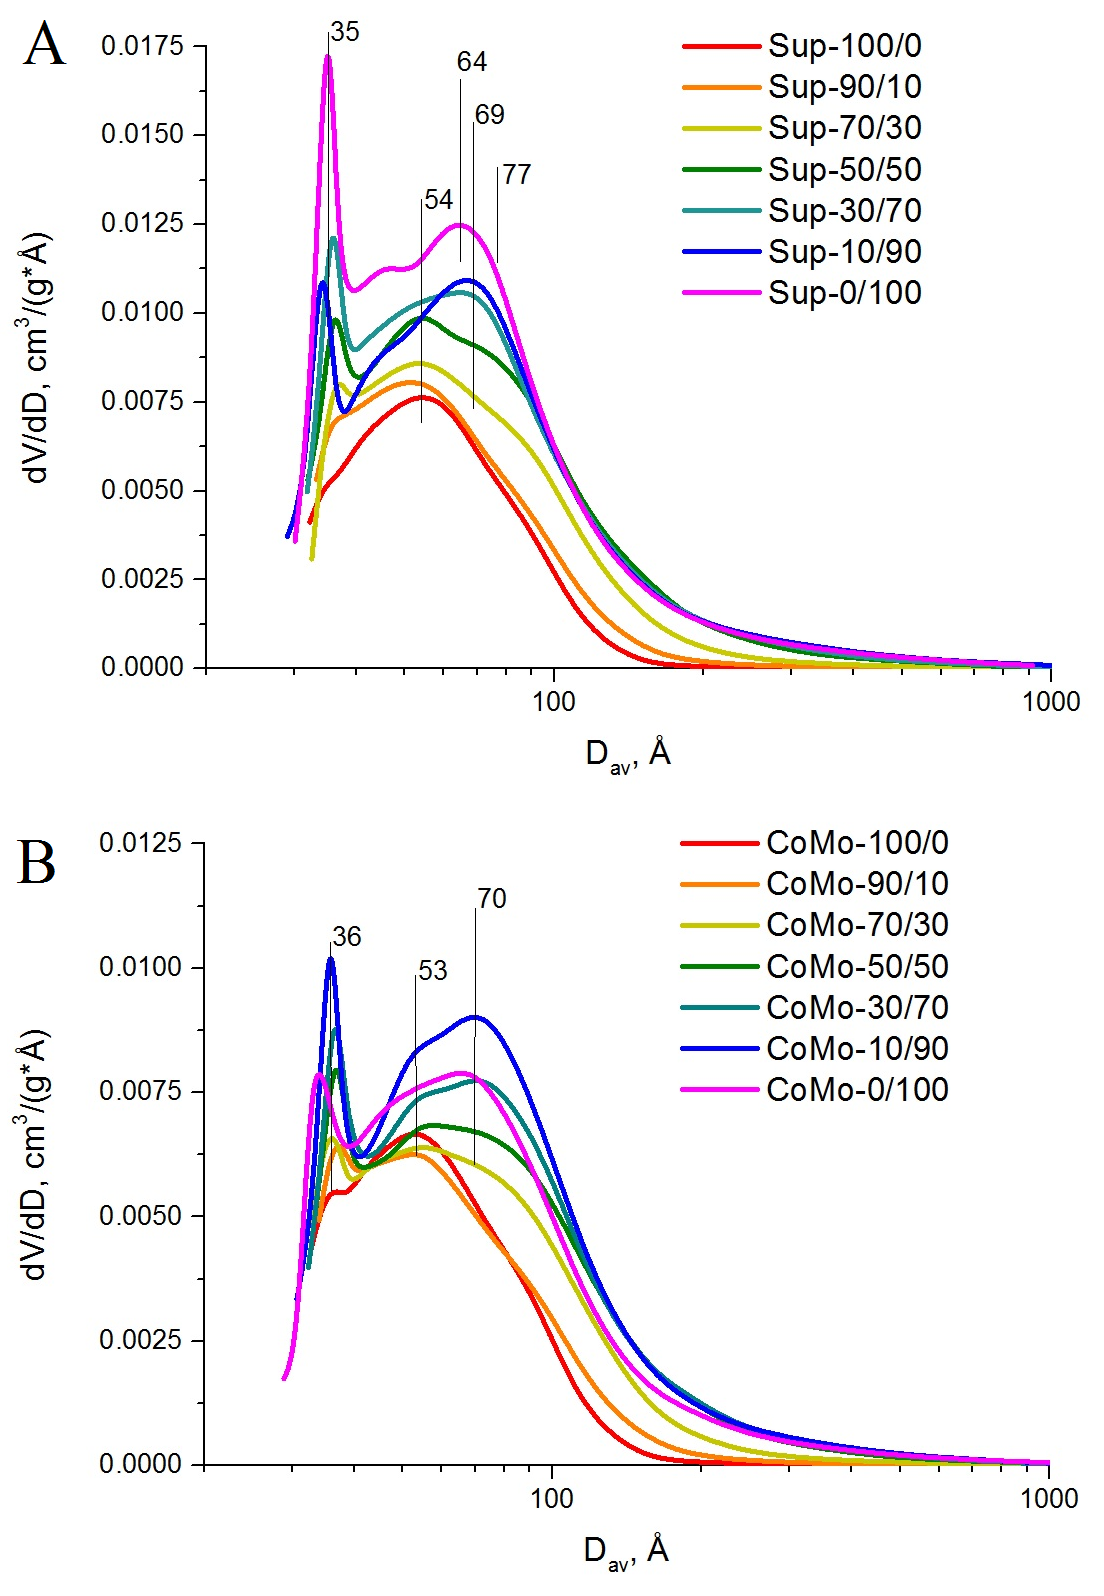


Figure SI5 – Pore size distributions of supports and catalysts.


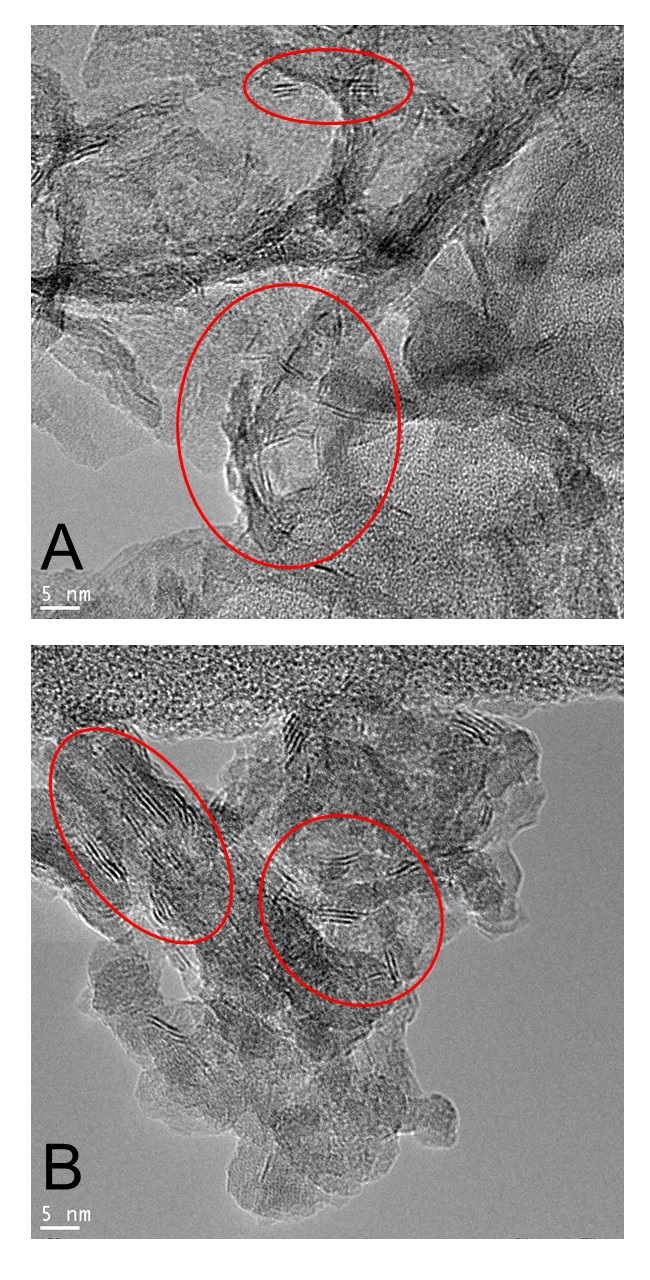


Figure SI6 – HRTEM images of active component particles located on a) ASA and b) alumina in CoMo-50/50. Red circles point out typical CoMoS particles.


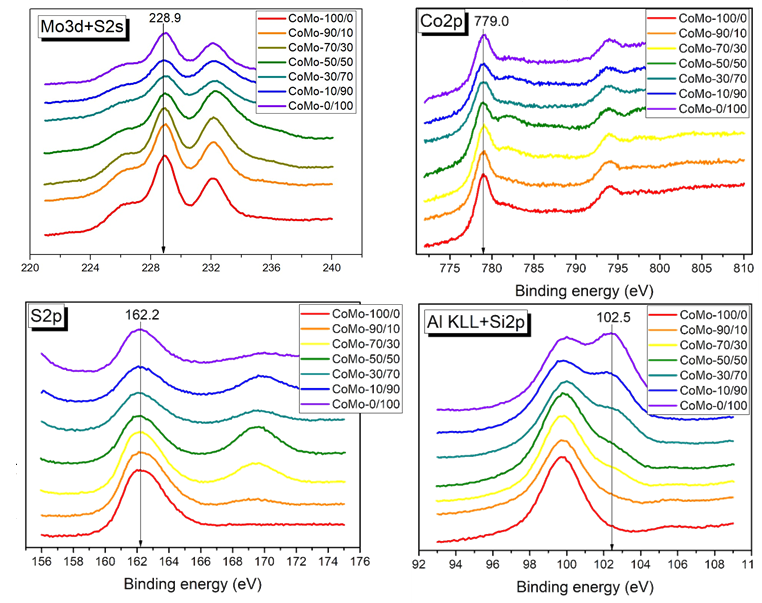


Figure SI7 – Mo3d, Co2p, S2s, S2p, Al KLL and Si2p XPS spectra of sulfide catalysts


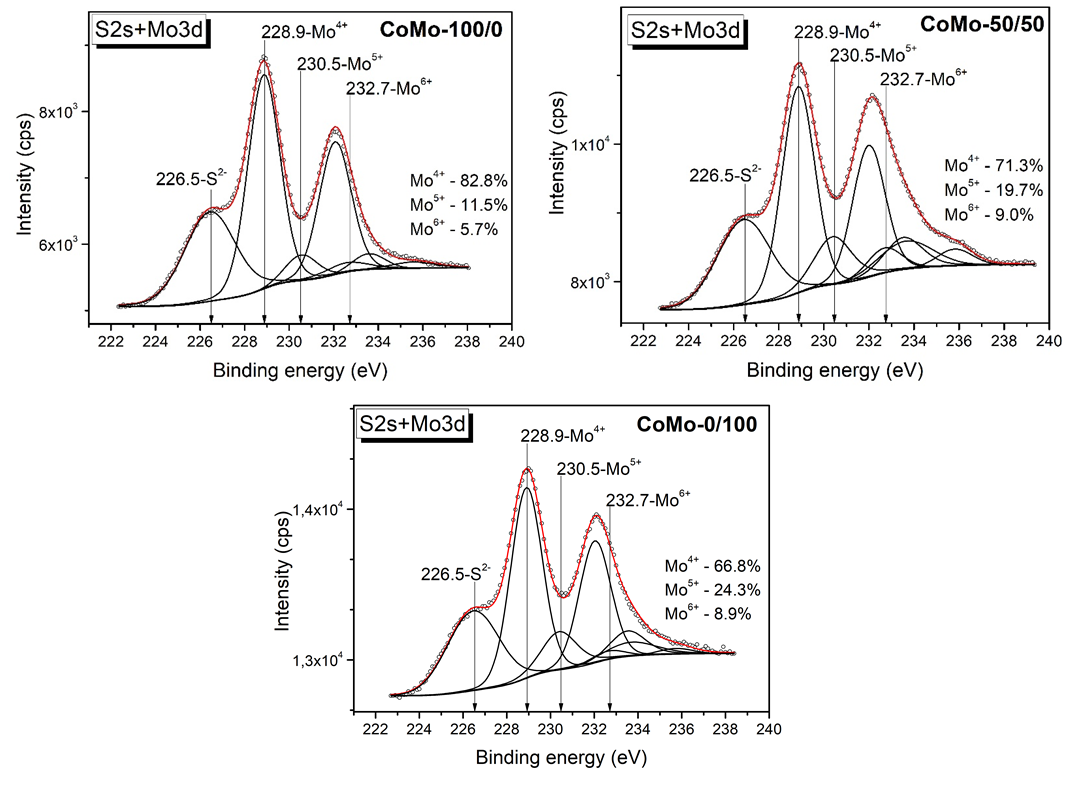


Figure SI8 – Deconvolution of Mo3d+S2s XPS spectra of CoMo-100/0, CoMo-50/50 and CoMo-0/100 sulfide catalysts
